# Supplementary material for: Organocatalyzed Bottom-up Formation of Protocells
Source: Research Square preprint supplement (doi:10.21203/rs.3.rs-6345142/v1), 2025-05-28
Supplement: Supplementary file 1 [file fa8d485f26a18ffa79cd8472.docx]

**SI Guide**

**Organocatalyzed Bottom-up Formation of Protocells**

Marian Simon Rafael Ebeling,1 Otto Berninghausen,2 Khang Hoang Nguyen,1 Roland Beckmann,2 Oliver Trapp1,3,*

1Department of Chemistry, Ludwig-Maximilians-University Munich, Munich, Germany.
2Department of Biochemistry, Gene Center, Ludwig-Maximilians-University Munich, Munich, Germany
3Max Planck Institute for Astronomy, Heidelberg, Germany

*Corresponding author: Email: [oliver.trapp@cup.uni-muenchen.de](mailto:oliver.trapp@cup.uni-muenchen.de)

**supplementary methods**

See supplementary information for detailed experimental descriptions, procedures, characterisations and analyses.

**supplementary video V1 – Live video of particle movement**

Using light microscopy, real time particle movement of a prebiotic reaction after 12 h (reaction condition 17) was observed. Scale bar size is 10 μm.

**supplementary video V2** **– Time lapse of the emergence of assemblies**

The assembly emergence was observed over 33 min and visualized by a time lapse. At the start, only single particles are visible. After 19 min, particles begin to appear and their number and size increase exponentially over time. The reaction mixture (condition 17) was sealed airtight on a microscope slide.

**supplementary video V3** **– Water accumulation and motion inside of a Coacervate**

Water production and motion inside a coacervate was observed as a time lapse using fluorescence microscopy with rhodamine B as a non-polar dye (condition 10, 1 d). The non-polar reaction medium is enabling fluorescence, whereas in the water spheres fluorescence is quenched. Scale bar size is 2 μm.

**supplementary video V4** **– Water motion and shuttling out of coacervate**

Water production, motion and outside-shuttling of a coacervate was observed as a time lapse using fluorescence microscopy with rhodamine B as a non-polar dye (condition 10, 1 d). The non-polar reaction medium is enabling fluorescence, whereas in the water spheres fluorescence is quenched. Scale bar size is 2 μm.

**supplementary video V5 – Slow motion of water shuttling out of coacervate**

Slow motion of water being shuttled outside of the coacervate (part of supplementary video V4, condition 10, 1 d).
